# Supplementary material for: Development and Validation of a Prediction Tool for Reoffending Risk in Domestic Violence
Source: PubMed Central journal article supplement (PMC10372708; doi:10.1001/jamanetworkopen.2023.25494), 2023-07-26
Supplement: jamanetwopen-e2325494-s001.pdf [file jamanetwopen-e2325494-s001.pdf]

## Supplemental Online Content

Yu R, Molero Y, Lichtenstein P, et al. Development and validation of a prediction tool for reoffending risk in domestic violence. *JAMA Netw Open*. 2023;6(7):e2325494. doi:10.1001/jamanetworkopen.2023.25494

**eTable 1.** ICD Codes for Mental Health and Prior Violence Victimization Included as Risk Factors

**eTable 2.** Parameters to Calculate Predicted Risk of Violent Reoffending Within 1, 3 and 5 Years After Arrest for Domestic Violence

**eFigure 1.** Model Discrimination Shown by Receiver Operating Characteristics Curves for Conviction of New Violent and Any Crime Within 5 Years

**eFigure 2.** Model Discrimination Shown by Receiver Operating Characteristics Curves for Conviction of New Violent Crime After Arrested for Domestic Violence

**eTable 3.** Sensitivity, Specificity, Negative Predictive Value, and Positive Predictive Value by Different Cutoff Scores for Probability of Violent Reoffending

**eFigure 3.** Model Calibration for Conviction of a New Violent Crime After Arrest for Domestic Violence

**eTable 4.** Brier Scores for Outcomes at Different Follow-Up Periods

**eTable 5.** Parameters to Calculate Predicted Risk of Any Reoffending Within 1, 3 and 5 Years After Arrest for Domestic Violence

**eFigure 4.** Risk Factors Included in the Final Model for Prediction of Conviction of a New Crime

**eFigure 5.** Model Discrimination Shown by Receiver Operating Characteristics Curves for Any Conviction of a New Crime

**eFigure 6.** Model Calibration for Any Conviction of a New Crime

**eTable 6.** Sensitivity, Specificity, Negative Predictive Value, and Positive Predictive Value by Different Cutoff Scores for Probability of Any Reoffending

**eTable 7.** Parameters to Calculate Predicted Risk of Domestic Violence Reoffending After Arrest for Domestic Violence

**eFigure 7.** Risk Factors Included in the Final Model for Prediction of Rearrest for Domestic Violence

**eFigure 8.** Model Discrimination Shown by Receiver Operating Characteristics Curves for Rearrest for Domestic Violence

**eFigure 9.** Model Calibration for Domestic Violence Reoffending

**eTable 8.** Sensitivity, Specificity, Negative Predictive Value, and Positive Predictive Value by Different Cutoff Scores for Probability of Domestic Violence Reoffending

This supplemental material has been provided by the authors to give readers additional information about their work.

eTable 1. ICD codes for mental health and prior violence victimization included as risk factors.

| <b>Mental health and prior violence victimization</b>                 | <b>ICD codes</b>                                                                                       |
|-----------------------------------------------------------------------|--------------------------------------------------------------------------------------------------------|
| Alcohol use disorders                                                 | ICD-8: 291, 303<br>ICD-9: 291, 303, 305A<br>ICD-10: F10                                                |
| Drug use disorders                                                    | ICD-8: 304<br>ICD-9: 292, 304, 305 (ex. A)<br>ICD-10: F11-F19                                          |
| Any other mental disorders (excluding alcohol and drug use disorders) | ICD-8: 290-315;<br>ICD-9: 290-319; ICD-10: F00-F99, excluding codes for alcohol and drug use disorders |
| Previous violent victimization                                        | ICD-9: E960–E969; ICD-10: X85–Y09                                                                      |

eTable 2. Parameters to calculate predicted risk of violent reoffending within 1, 3 and 5 years after arrest for domestic violence

| Risk factors                    | Beta      | LCI       | UCI       |
|---------------------------------|-----------|-----------|-----------|
| Younger age band                | .220413   | .1858410  | .254985   |
| Gender (male vs. female)        | 1.160324  | .8906512  | 1.429997  |
| Education                       |           |           |           |
| Secondary                       | 0         | 0         | 0         |
| Upper-Secondary                 | -.130387  | -.2056981 | -.0550759 |
| Post-Secondary                  | -.4089439 | -.5515529 | -.2663349 |
| Single                          | .1853120  | .0999844  | .2706396  |
| Unemployment                    | .2909272  | .2150476  | .3668068  |
| Previous domestic violence      | .9555379  | .8032894  | 1.107786  |
| Alcohol use disorder            | .3005242  | .2100445  | .3910040  |
| Drug use disorder               | .1818258  | .0832849  | .2803666  |
| Any mental disorder             | .1634459  | .0813655  | .2455262  |
| Previous non-domestic violence  | .9116243  | .7830923  | 1.040156  |
| Previous non-violent offending  | .3165099  | .1709196  | .4621002  |
| Previous imprisonment           | .7901411  | .7056122  | .8746700  |
| Previous violence victimization | .0986350  | -.0065498 | .2038198  |
| Parental violent conviction     | .1447788  | .0472451  | .2423125  |

Note: LCI = Lower Confidence Interval; UCI = Upper Confidence Interval.

Unemployment and single status refer to status at time of arrest for domestic violence.

Derivation sample

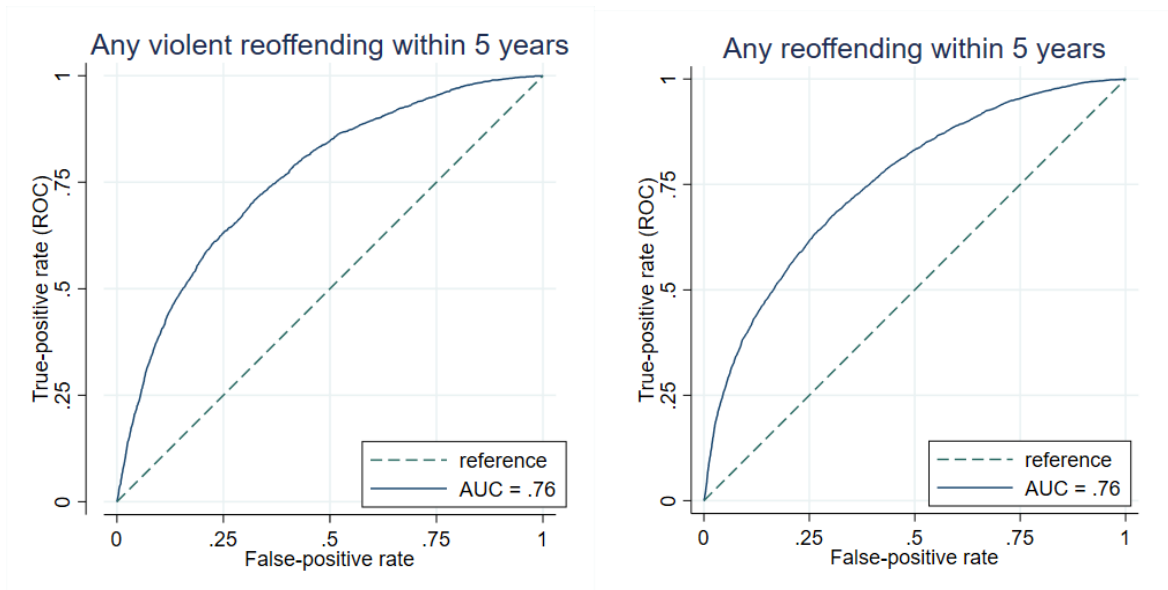

eFigure 1. Model discrimination shown by receiver operating characteristics curves for conviction of new violent and any crime within 5 years

Note: AUC = areas under the receiver operating characteristics curves.

Validation sample

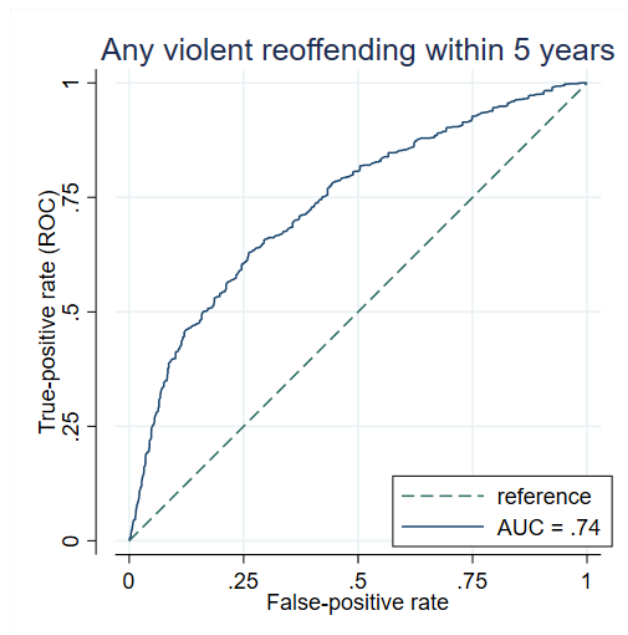

eFigure 2. Model discrimination shown by receiver operating characteristics curves for conviction of new violent crime after arrest for domestic violence

Note: AUC = areas under the receiver operating characteristics curve.

eTable 3. Sensitivity, specificity, negative predictive value, and positive predictive value by different cut-off scores for probability of violent reoffending

| Cut-off                       | Sensitivity (95%CI) |            | Specificity (95%CI) |            | PPV (95%CI) |            | NPV (95%CI) |            | Accuracy (95%CI) |            |
|-------------------------------|---------------------|------------|---------------------|------------|-------------|------------|-------------|------------|------------------|------------|
| <b>Within 1 year (5.9%)</b>   |                     |            |                     |            |             |            |             |            |                  |            |
| 5%                            | 75.6                | 73.1, 77.9 | 60.4                | 59.7, 61.0 | 10.6        | 10.3, 10.9 | 97.6        | 97.3, 97.8 | 61.3             | 60.6, 61.9 |
| 10%                           | 47.0                | 44.2, 49.7 | 85.3                | 84.8, 85.8 | 16.6        | 15.7, 17.5 | 96.3        | 96.1, 96.5 | 83.1             | 82.6, 83.5 |
| 15%                           | 28.4                | 26.0, 31.0 | 92.6                | 92.2, 92.9 | 19.2        | 17.7, 20.7 | 95.4        | 95.3, 95.6 | 88.8             | 88.4, 89.2 |
| 20%                           | 16.5                | 14.5, 18.6 | 96.1                | 95.9, 96.4 | 20.9        | 18.7, 23.3 | 94.9        | 94.8, 95.0 | 91.5             | 91.1, 91.8 |
| <b>Within 3 years (11.0%)</b> |                     |            |                     |            |             |            |             |            |                  |            |
| 5%                            | 94.2                | 93.2, 95.1 | 28.8                | 28.2, 29.5 | 14.1        | 13.9, 14.2 | 97.6        | 97.2, 98.0 | 36.0             | 35.4, 36.7 |
| 10%                           | 77.2                | 75.4, 78.8 | 59.4                | 58.7, 60.1 | 19.0        | 18.6, 19.4 | 95.5        | 95.1, 95.8 | 61.4             | 60.7, 62.0 |
| 15%                           | 60.4                | 58.5, 62.4 | 77.7                | 77.1, 78.2 | 25.0        | 24.3, 25.8 | 94.1        | 93.8, 94.4 | 75.8             | 75.2, 76.3 |
| 20%                           | 47.7                | 45.7, 49.7 | 86.4                | 86.0, 86.9 | 30.3        | 29.2, 31.5 | 93.1        | 92.8, 93.3 | 82.2             | 81.7, 82.7 |
| <b>Within 5 years (13.2%)</b> |                     |            |                     |            |             |            |             |            |                  |            |
| 5%                            | 97.8                | 97.1, 98.3 | 17.9                | 17.4, 18.5 | 15.3        | 15.2, 15.4 | 98.1        | 97.6, 98.5 | 28.4             | 27.8, 29.0 |
| 10%                           | 86.8                | 85.5, 88.0 | 46.9                | 46.2, 47.6 | 19.9        | 19.6, 20.2 | 95.9        | 95.5, 96.3 | 52.1             | 51.5, 52.8 |
| 15%                           | 72.1                | 70.5, 73.7 | 66.3                | 65.6, 67.0 | 24.5        | 24.0, 25.1 | 94.0        | 93.7, 94.3 | 67.1             | 66.4, 67.7 |
| 20%                           | 58.8                | 57.0, 60.6 | 79.0                | 78.4, 79.6 | 29.8        | 29.0, 30.7 | 92.7        | 92.4, 93.0 | 76.3             | 75.8, 76.9 |

Note: Data are given in percentages. 95%CI, 95% confidence interval; PPV, positive predictive value; NPV, negative predictive value.

### Derivation sample

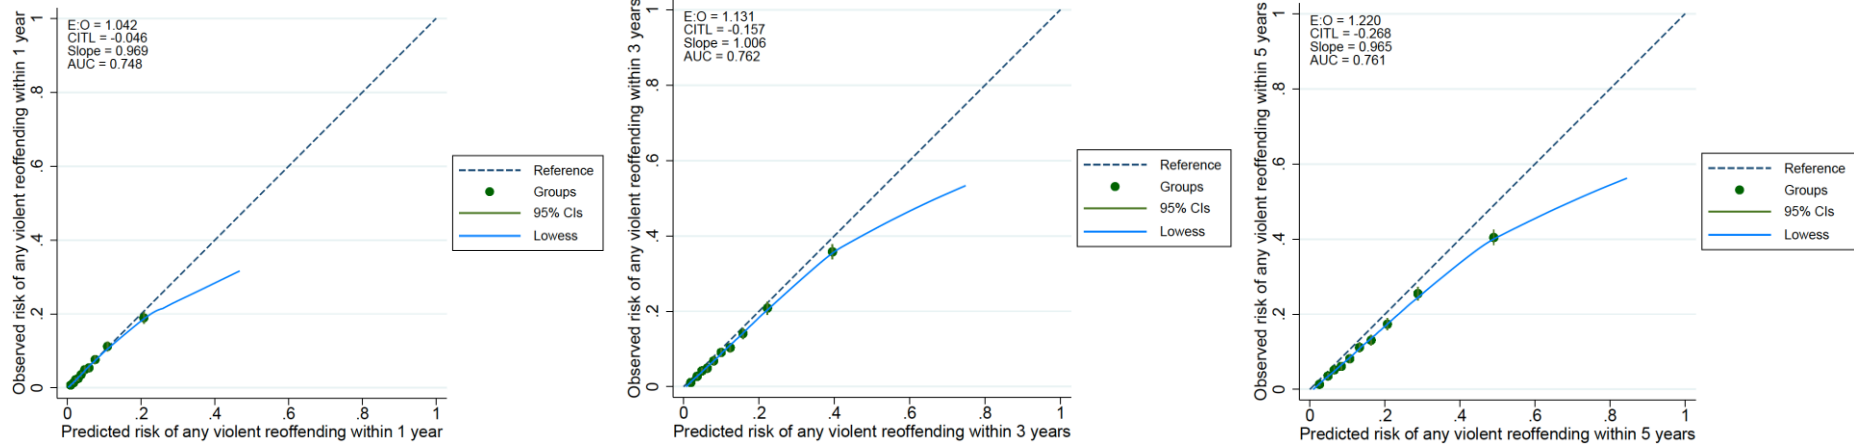

eFigure 3. Model calibration for conviction of a new violent crime after arrest for domestic violence

eTable 4. Brier scores for outcomes at different follow-up periods

|                               | Brier scores          |                  |                  |                       |                  |                  |                       |                  |                  |
|-------------------------------|-----------------------|------------------|------------------|-----------------------|------------------|------------------|-----------------------|------------------|------------------|
|                               | Within 1 year         |                  |                  | Within 3 years        |                  |                  | Within 5 years        |                  |                  |
|                               | Predicted probability | Mean probability | Zero probability | Predicted probability | Mean probability | Zero probability | Predicted probability | Mean probability | Zero probability |
| Violent reoffending           | .0523524              | .0551053         | .0585245         | .0882511              | .0980276         | .1098965         | .1030576              | .1152705         | .1318039         |
| Any reoffending               | .1120699              | .1291324         | .1522717         | .1590365              | .1927062         | .2580747         | .1756005              | .2119123         | .2952767         |
| Domestic violence reoffending | .0342010              | .0344852         | .0357625         | .0537859              | .0546647         | .0579847         | .0609968              | .0622506         | .0665317         |



eTable 5. Parameters to calculate predicted risk of any reoffending within 1, 3 and 5 years after arrest for domestic violence

| Risk factors                   | Beta      | LCI       | UCI       |
|--------------------------------|-----------|-----------|-----------|
| Younger age                    | .199829   | .17706    | .222597   |
| Education                      |           |           |           |
| Secondary                      | 0         | 0         | 0         |
| Upper-Secondary                | -.1053170 | -.1571728 | -.0534612 |
| Post-Secondary                 | -.3424799 | -.4292359 | -.2557239 |
| Gender (male vs female)        | .9894505  | .8281887  | 1.150712  |
| Victim gender (female vs male) | .1204480  | .0439283  | .1969677  |
| Single                         | .1787854  | .1228149  | .2347558  |
| Unemployed                     | .3419535  | .2915357  | .3923712  |
| Alcohol use disorder           | .1488652  | .0860632  | .2116672  |
| Drug use disorder              | .3365078  | .2671643  | .4058513  |
| Previous domestic violence     | .7311871  | .6314382  | .830936   |
| Previous non-domestic violence | .8235980  | .7438294  | .9033665  |
| Previous non-violent offending | .6811361  | .594876   | .7673962  |
| Previous imprisonment          | .8484444  | .7862553  | .9106334  |
| Previous violent victimization | .1614818  | .0872972  | .2356664  |
| Parental any offending         | .1517112  | .1008475  | .2025749  |

Note: LCI = Lower Confidence Interval; UCI = Upper Confidence Interval.  
 Unemployment refers to status at time of arrest for domestic violence.

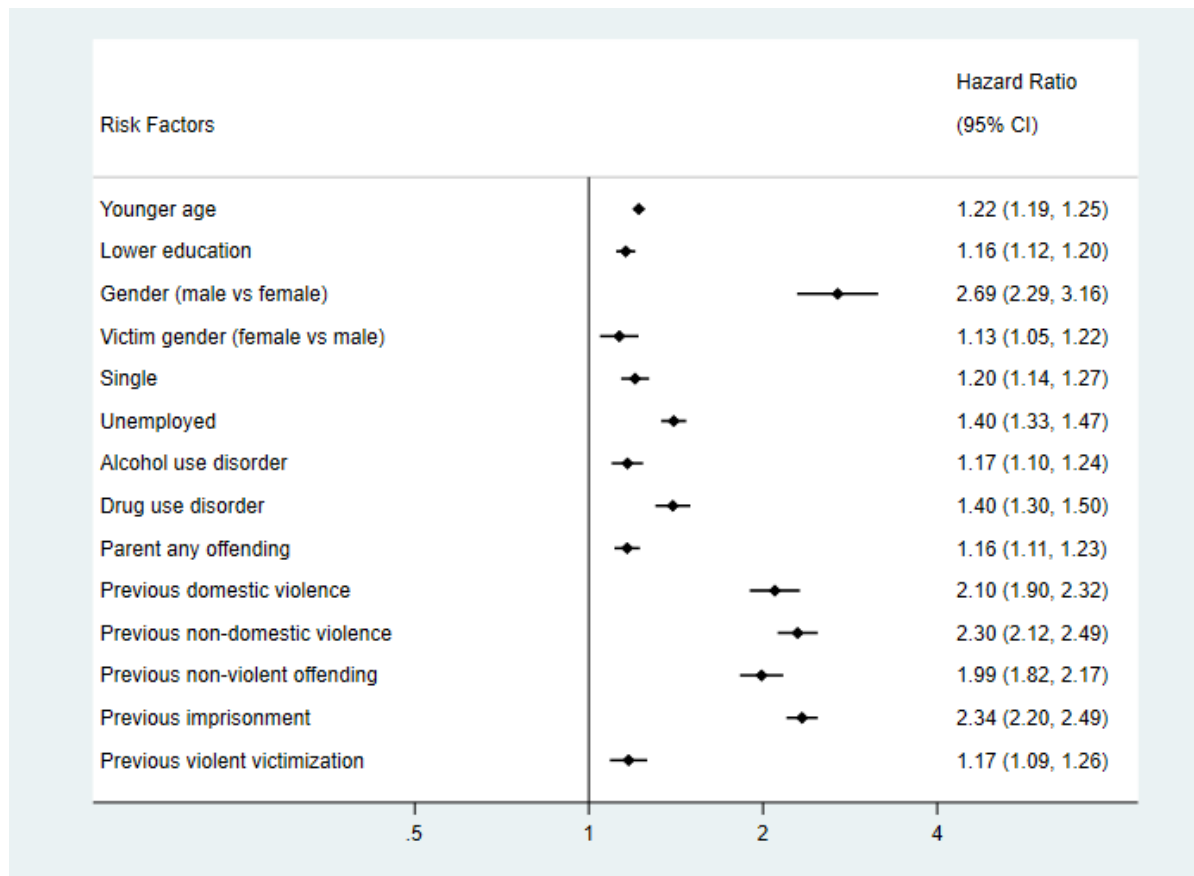

eFigure 4. Risk factors included in the final model for prediction of conviction of a new crime

Note: Younger age refers to the effect per 10 years of age. Unemployment refers to status at time of arrest for domestic violence. Hazard ratios were for the whole study period with a mean follow-up period of 22.4 months.

Validation sample

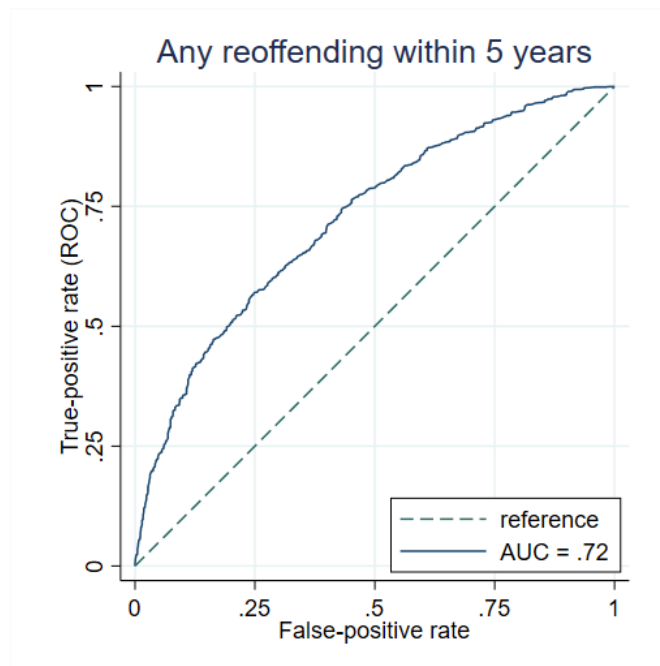

eFigure 5. Model discrimination shown by receiver operating characteristics curves for any conviction of a new crime

Note: AUC = areas under the receiver operating characteristics curve.

## Derivation sample

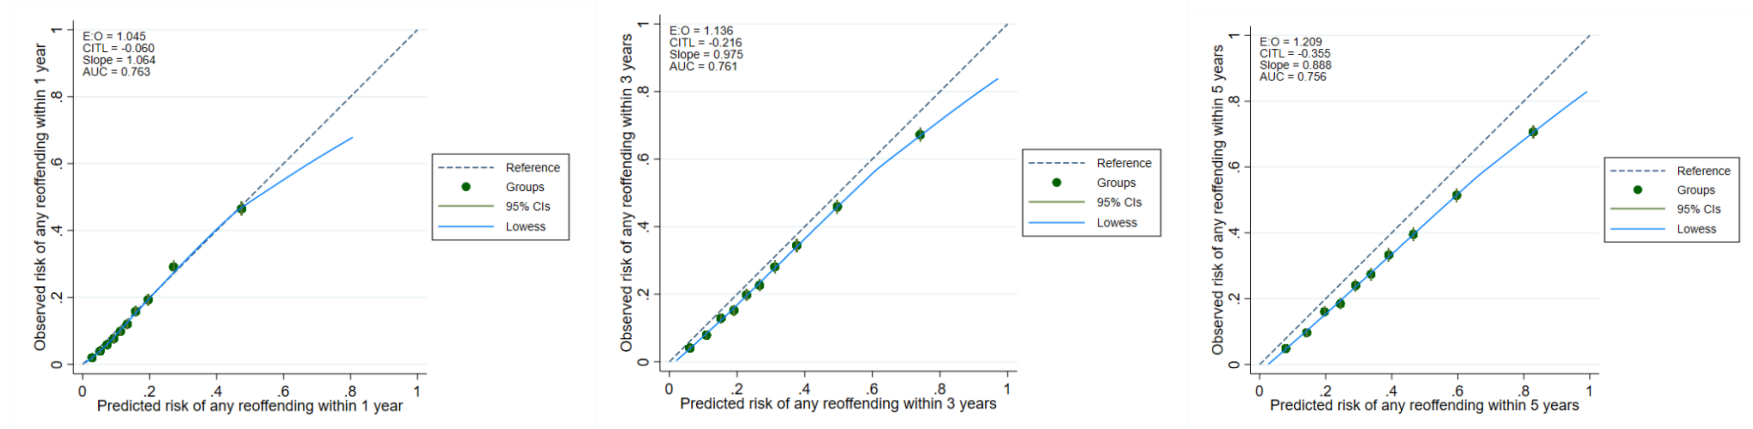

eFigure 6. Model calibration for any conviction of a new crime

eTable 6. Sensitivity, specificity, negative predictive value, and positive predictive value by different cut-off scores for probability of any reoffending

| Cut-off                       | Sensitivity (95%CI) |            | Specificity (95%CI) |            | PPV (95%CI) |            | NPV (95%CI) |            | Accuracy (95%CI) |            |
|-------------------------------|---------------------|------------|---------------------|------------|-------------|------------|-------------|------------|------------------|------------|
| <b>Within 1 year (15.2%)</b>  |                     |            |                     |            |             |            |             |            |                  |            |
| 5%                            | 97.7                | 97.2, 98.2 | 16.2                | 15.7, 16.7 | 17.3        | 17.2, 17.4 | 97.5        | 96.9, 98.0 | 28.6             | 28.0, 29.2 |
| 10%                           | 87.8                | 86.6, 88.9 | 43.5                | 42.8, 44.2 | 21.8        | 21.5, 22.1 | 95.2        | 94.8, 95.6 | 50.2             | 49.6, 50.9 |
| 15%                           | 71.0                | 69.5, 72.5 | 68.0                | 67.3, 68.7 | 28.5        | 27.9, 29.1 | 92.9        | 92.5, 93.2 | 68.5             | 67.9, 69.1 |
| 20%                           | 54.8                | 53.1, 56.5 | 81.6                | 81.1, 82.2 | 34.9        | 34.0, 35.9 | 91.0        | 90.6, 91.3 | 77.6             | 77.0, 78.1 |
| <b>Within 3 years (25.8%)</b> |                     |            |                     |            |             |            |             |            |                  |            |
| 5%                            | 99.7                | 99.5, 99.8 | 4.4                 | 4.1, 4.7   | 26.6        | 26.6, 26.7 | 97.7        | 96.3, 98.6 | 29.0             | 28.4, 29.6 |
| 10%                           | 97.7                | 97.3, 98.1 | 16.4                | 15.8, 17.0 | 28.9        | 28.7, 29.1 | 95.3        | 94.5, 96.0 | 37.4             | 36.8, 38.0 |
| 15%                           | 93.4                | 92.7, 94.0 | 30.5                | 29.8, 31.2 | 31.9        | 31.6, 32.1 | 93.0        | 92.3, 93.6 | 46.7             | 46.1, 47.4 |
| 20%                           | 86.1                | 85.2, 87.0 | 45.5                | 44.8, 46.3 | 35.5        | 35.1, 35.9 | 90.4        | 89.8, 91.0 | 56.0             | 55.4, 56.7 |
| <b>Within 5 years (29.5%)</b> |                     |            |                     |            |             |            |             |            |                  |            |
| 5%                            | 99.9                | 99.7, 99.9 | 2.1                 | 1.9, 2.3   | 29.9        | 29.9, 30.0 | 97.0        | 94.6, 98.4 | 31.0             | 30.4, 31.6 |
| 10%                           | 99.1                | 98.8, 99.3 | 10.3                | 9.8, 10.7  | 31.6        | 31.5, 31.8 | 96.5        | 95.5, 97.2 | 36.5             | 35.9, 37.1 |
| 15%                           | 96.4                | 95.9, 96.9 | 21.9                | 21.2, 22.5 | 34.1        | 33.9, 34.3 | 93.6        | 92.8, 94.3 | 43.9             | 43.2, 44.5 |
| 20%                           | 92.5                | 91.8, 93.1 | 33.2                | 32.4, 33.9 | 36.7        | 36.4, 37.0 | 91.3        | 90.6, 92.0 | 50.7             | 50.0, 51.3 |

Note: Data are given in percentages. 95%CI, 95% confidence interval; PPV, positive predictive value; NPV, negative predictive value.

eTable 7. Parameters to calculate predicted risk of domestic violence reoffending after arrest for domestic violence

| Risk factors                   | Beta     | LCI      | UCI      |
|--------------------------------|----------|----------|----------|
| Gender (male vs female)        | .4716495 | .218265  | .725034  |
| Unemployment                   | .1420303 | .040481  | .2435795 |
| Alcohol use disorder           | .1951887 | .0750615 | .3153159 |
| Previous domestic violence     | 1.215765 | 1.044009 | 1.38752  |
| Previous non-domestic violence | .5246828 | .3769027 | .672463  |
| Previous non-violent offending | .2068696 | .0407849 | .3729544 |
| Previous imprisonment          | .3740933 | .2490086 | .499178  |

Note: LCI = Lower Confidence Interval; UCI = Upper Confidence Interval. Unemployment refers to status at time of arrest for domestic violence.

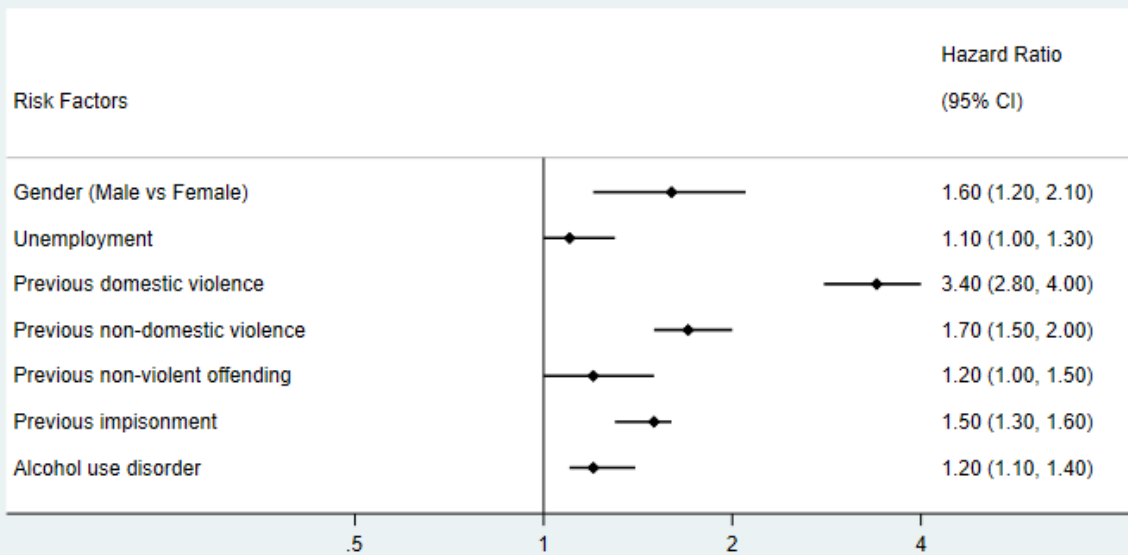

eFigure 7. Risk factors included in the final model for prediction of rearrest for domestic violence

Note: Unemployment refers to status at year of arrested for domestic violence. Hazard ratios were for the whole study period with a mean follow-up period of 25.7 months.

Derivation sample

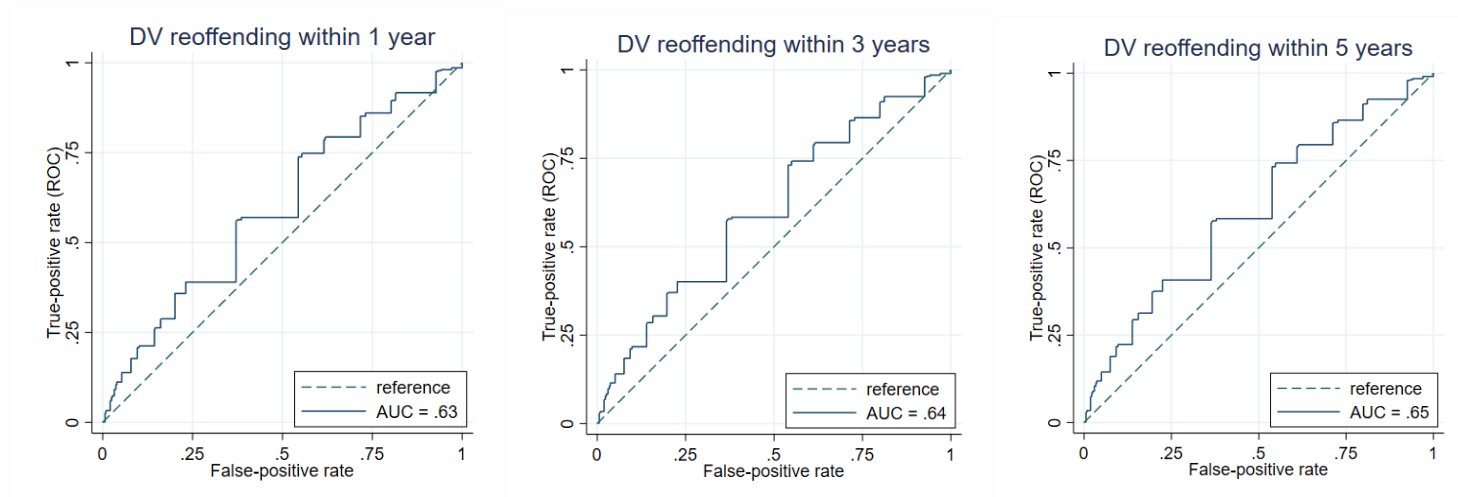

eFigure 8. Model discrimination shown by receiver operating characteristics curves for rearrest for domestic violence

Note: DV = Domestic Violence. AUC = areas under the receiver operating characteristics curve.



## Derivation sample

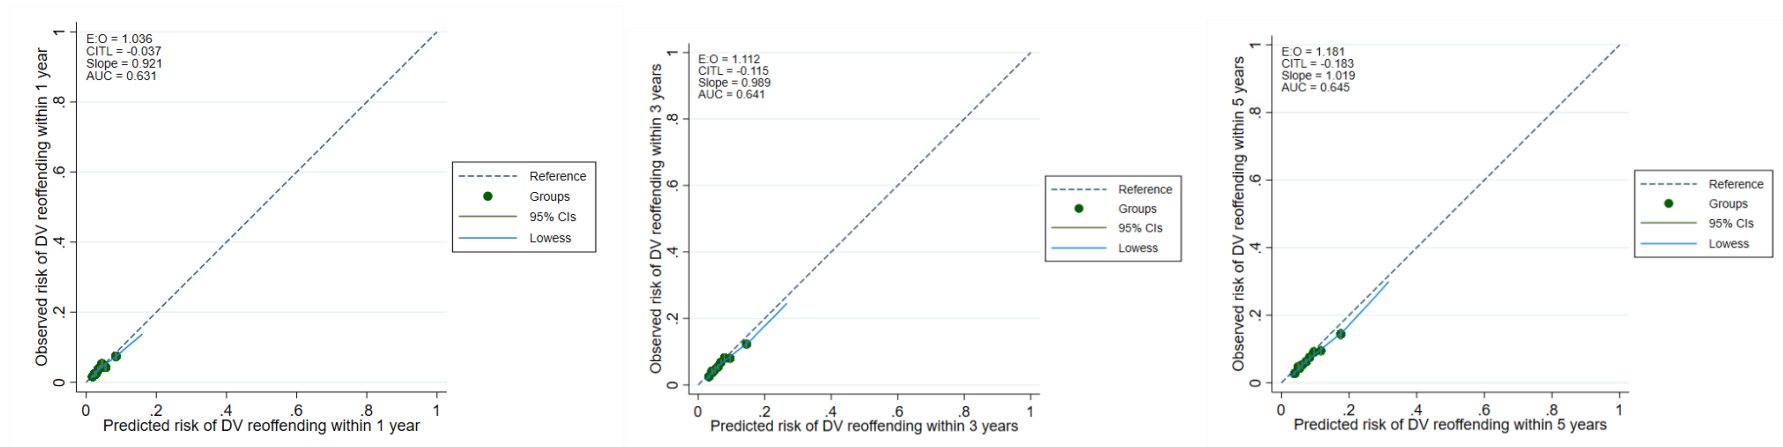

eFigure 9. Model calibration for domestic violence reoffending

Note: DV = Domestic Violence.

eTable 8. Sensitivity, specificity, negative predictive value, and positive predictive value by different cut-off scores for probability of domestic violence reoffending

| Cut-off                          | Sensitivity (95%CI) |            | Specificity (95%CI) |            | PPV (95%CI) |            | NPV (95%CI) |            | Accuracy (95%CI) |            |
|----------------------------------|---------------------|------------|---------------------|------------|-------------|------------|-------------|------------|------------------|------------|
| <b>Within 1 year<br/>(3.6%)</b>  |                     |            |                     |            |             |            |             |            |                  |            |
| 5%                               | 26.3                | 23.3, 29.5 | 85.4                | 84.9, 85.9 | 6.3         | 5.6, 7.0   | 96.9        | 96.8, 97.0 | 83.3             | 82.8, 83.8 |
| 10%                              | 5.9                 | 4.4, 7.8   | 97.9                | 97.7, 98.1 | 9.5         | 7.3, 12.4  | 96.6        | 96.5, 96.6 | 94.6             | 94.3, 94.9 |
| <b>Within 3 years<br/>(5.8%)</b> |                     |            |                     |            |             |            |             |            |                  |            |
| 5%                               | 79.3                | 77.0, 81.5 | 38.5                | 37.9, 39.2 | 7.4         | 7.2, 7.6   | 96.8        | 96.4, 97.1 | 40.9             | 40.3, 41.6 |
| 10%                              | 21.7                | 19.5, 24.1 | 90.2                | 89.7, 90.6 | 7.6         | 6.8, 8.4   | 96.9        | 96.8, 97.0 | 87.7             | 87.3, 88.1 |
| 15%                              | 9.6                 | 8.3, 11.6  | 97.0                | 96.7, 97.2 | 10.7        | 9.1, 12.6  | 96.7        | 96.6, 96.  | 93.8             | 93.5, 94.1 |
| 20%                              | 2.9                 | 2.0, 3.9   | 99.4                | 99.3, 99.5 | 15.4        | 11.2, 20.7 | 96.5        | 96.5, 96.5 | 96.0             | 95.7, 96.2 |
| <b>Within 5 years<br/>(6.7%)</b> |                     |            |                     |            |             |            |             |            |                  |            |
| 5%                               | 91.1                | 89.5, 92.5 | 20.2                | 19.6, 20.7 | 7.5         | 7.4, 7.6   | 97.0        | 96.4, 97.4 | 24.9             | 24.3, 25.5 |
| 10%                              | 37.3                | 34.6, 39.8 | 80.5                | 80.0, 81.1 | 12.0        | 11.3, 12.8 | 94.8        | 94.5, 94.9 | 77.6             | 77.1, 78.2 |
| 15%                              | 14.4                | 12.7, 16.3 | 95.0                | 94.7, 95.3 | 17.1        | 15.2, 19.1 | 94.0        | 93.9, 94.1 | 89.7             | 89.2, 90.1 |
| 20%                              | 7.4                 | 6.2, 8.9   | 98.1                | 97.9, 98.3 | 21.6        | 18.4, 25.3 | 93.7        | 93.6, 93.8 | 92.1             | 91.7, 92.4 |

Note: Data are given in percentages. 95%CI, 95% confidence interval; PPV, positive predictive value; NPV, negative predictive value.

Accuracy: overall probability that a patient is correctly classified (=Sensitivity × Prevalence + Specificity × [1 – Prevalence]).
